# Supplementary material for: A Novel Population of Fusarium fujikuroi Isolated from Southeastern U.S. Winegrapes Reveals the Need to Re-Evaluate the Species’ Fumonisin Production
Source: Toxins (Basel). 2016 Aug 31;8(9):254. doi: 10.3390/toxins8090254 (PMC5037480; doi:10.3390/toxins8090254)
Supplement: Supplementary file 1 [file toxins-08-00254-s001.xlsx]

## Sheet: Fusarium_proliferatum_TEF_ident
Percent identity matrix based on ClustalW alignment for Fusarium isolates obtained from southeastern U.S. winegrapes (NRRL 664XX) compared to reference strains (bold font). Identity values of F. proliferatum compared to F. fujikuroi are shown in grey.
	NRRL 66438	NRRL 66441	NRRL 66431	NRRL 66428	NRRL 13566 AF160279	NRRL 13998 AB725605	NRRL 31857	NRRL 31862	NRRL 31886	NRRL 22012 JN092354	NRRL 31879	NRRL 5538 HF679028	NRRL 66443	NRRL 66450	NRRL 66453	NRRL 66429	NRRL 66452	NRRL 66432	NRRL 31883	NRRL 66415	NRRL 66446	NRRL 66423	NRRL 66448	NRRL 66426	NRRL 66437	NRRL 66445	NRRL 66421	NRRL 66427	NRRL 66447	NRRL 66425	NRRL 66444	NRRL 66439	NRRL 66430	NRRL 66418	NRRL 22944 AF160280	NRRL 66422	NRRL 66424	NRRL 31915	NRRL 66420	NRRL 66442	NRRL 31860	NRRL 31867	NRRL 66419	NRRL 66416	NRRL 66451	NRRL 31871	NRRL 31865	NRRL 31866	NRRL 66417
NRRL 66438		99.7701	99.8644	99.6377	97.122	98.7973	98.4991	98.542	98.7993	98.9691	98.9691	99.1409	98.9691	98.9691	98.9691	99.2701	99.3007	99.3127	99.1274	99.1103	99.1289	99.1197	99.1409	99.4845	99.4774	99.1409	99.3127	99.4845	99.4845	98.7113	99.1409	99.1409	99.1409	98.9691	94.5671	95.0764	95.0764	94.9066	94.9066	95.0764	94.8642	94.9232	95.0764	95.6822	95.6757	95.0764	93.9509	95.5857	95.5857
NRRL 66441	99.7701		99.7701	99.7701	98.2184	99.3103	98.9106	98.9679	99.3119	99.5402	99.5402	99.7701	99.5402	99.5402	99.5402	100	100	100	99.7653	99.759	99.7658	99.7625	99.7701	99.7701	99.7658	99.5402	99.7701	99.7701	99.7701	98.9655	99.7701	99.7701	99.7701	99.5402	95.0226	95.7014	95.7014	95.4751	95.4751	95.7014	95.9276	95.2164	95.2489	96.0648	96.0784	95.2489	95.1014	95.9276	95.9276
NRRL 66431	99.8644	99.7701		99.6377	97.6944	99.2767	98.9621	99.0072	99.278	99.4575	99.4575	99.6383	99.4575	99.4575	99.4575	99.8073	99.8158	99.8192	99.6324	99.6248	99.633	99.6289	99.6383	100	100	99.6383	99.8192	100	100	99.1863	99.6383	99.6383	99.6383	99.4575	95.1786	95.7143	95.7143	95.5357	95.5357	95.7143	95.4911	95.377	95.5357	96.1818	96.1977	95.5357	94.3505	96.0714	96.0714
NRRL 66428	99.6377	99.7701	99.6377		97.6902	99.2754	98.9602	99.0054	99.2767	99.4565	99.4565	99.6377	99.4565	99.4565	99.4565	99.8069	99.8155	99.8188	100	100	100	100	100	99.6377	99.6324	99.2754	99.4565	99.6377	99.6377	99.0036	100	100	100	99.8185	95.5197	96.0573	96.0573	95.8781	95.8781	96.0573	95.483	95.7207	95.8781	96.5328	96.5649	95.8781	94.6875	96.4158	96.4158
NRRL 13566 AF160279	97.122	98.2184	97.6944	97.6902		98.1959	97.8988	97.5986	97.8559	98.0241	98.0241	97.8522	97.6804	97.6804	97.6804	97.5365	97.6399	97.6804	97.4695	97.4199	97.4739	97.4472	97.5086	97.5086	97.4739	97.1649	97.3368	97.5086	97.5086	96.9072	97.5086	97.5086	97.5086	97.3368	92.9542	93.4635	93.4635	93.2937	93.2937	93.4635	93.4211	93.302	93.4635	93.8687	93.7838	93.4635	92.3435	93.8031	93.8031
NRRL 13998 AB725605	98.7973	99.3103	99.2767	99.2754	98.1959		99.6998	99.3997	99.6569	99.8473	99.8282	99.6564	99.4845	99.4845	99.4845	99.4526	99.4755	99.4845	99.3019	99.2883	99.3031	99.2958	99.3127	99.3127	99.3031	98.9691	99.1409	99.3127	99.3127	98.7113	99.3127	99.3127	99.3127	99.1409	94.7368	95.2462	95.2462	95.0764	95.0764	95.2462	95.034	95.0939	95.2462	95.6822	95.6757	95.2462	93.9509	95.5857	95.5857
NRRL 31857	98.4991	98.9106	98.9621	98.9602	97.8988	99.6998		99.5712	99.6998	99.5283	99.5283	99.3568	99.1852	99.1852	99.1852	99.2714	99.3019	99.1852	98.9983	99.1119	99	99.1213	99.0137	99.0137	99	98.6707	98.8422	99.0137	99.0137	98.4134	99.0137	99.0137	99.0137	98.8422	94.6095	95.1188	95.1188	94.9491	94.9491	95.1188	94.9066	94.9659	95.1188	95.6822	95.6757	95.1188	93.824	95.4584	95.4584
NRRL 31862	98.542	98.9679	99.0072	99.0054	97.5986	99.3997	99.5712		99.7427	99.5712	99.5712	99.3997	99.2281	99.2281	99.2281	99.4536	99.3455	99.2281	99.0418	99.2895	99.0435	99.297	99.0566	99.0566	99.0435	98.7136	98.8851	99.0566	99.0566	98.4563	99.0566	99.0566	99.0566	98.8851	94.652	95.1613	95.1613	94.9915	94.9915	95.1613	94.9491	95.0085	95.1613	95.7254	95.8559	95.1613	93.8663	95.5008	95.5008
NRRL 31886	98.7993	99.3119	99.278	99.2767	97.8559	99.6569	99.6998	99.7427		99.8285	99.8285	99.6569	99.4854	99.4854	99.4854	99.4536	99.4764	99.4854	99.3031	99.2895	99.3043	99.297	99.3139	99.3139	99.3043	98.9708	99.1424	99.3139	99.3139	98.7136	99.3139	99.3139	99.3139	99.1424	94.9066	95.416	95.416	95.2462	95.2462	95.416	95.2037	95.2645	95.416	95.8549	95.8559	95.416	94.1201	95.7555	95.7555
NRRL 22012 JN092354	98.9691	99.5402	99.4575	99.4565	98.0241	99.8473	99.5283	99.5712	99.8285		100	99.8282	99.6564	99.6564	99.6564	99.635	99.6503	99.6564	99.4764	99.4662	99.4774	99.4718	99.4845	99.4845	99.4774	99.1409	99.3127	99.4845	99.4845	98.8832	99.4845	99.4845	99.4845	99.3127	94.9066	95.416	95.416	95.2462	95.2462	95.416	95.2037	95.2645	95.416	95.8549	95.8559	95.416	94.1201	95.7555	95.7555
NRRL 31879	98.9691	99.5402	99.4575	99.4565	98.0241	99.8282	99.5283	99.5712	99.8285	100		99.8282	99.6564	99.6564	99.6564	99.635	99.6503	99.6564	99.4764	99.4662	99.4774	99.4718	99.4845	99.4845	99.4774	99.1409	99.3127	99.4845	99.4845	98.8832	99.4845	99.4845	99.4845	99.3127	94.9066	95.416	95.416	95.2462	95.2462	95.416	95.2037	95.2645	95.416	95.8549	95.8559	95.416	94.1201	95.7555	95.7555
NRRL 5538 HF679028	99.1409	99.7701	99.6383	99.6377	97.8522	99.6564	99.3568	99.3997	99.6569	99.8282	99.8282		99.8282	99.8282	99.8282	99.8175	99.8252	99.8282	99.651	99.6441	99.6516	99.6479	99.6564	99.6564	99.6516	99.3127	99.4845	99.6564	99.6564	99.055	99.6564	99.6564	99.6564	99.4845	95.0764	95.5857	95.5857	95.416	95.416	95.5857	95.3735	95.4352	95.5857	96.0276	96.036	95.5857	94.2893	95.9253	95.9253
NRRL 66443	98.9691	99.5402	99.4575	99.4565	97.6804	99.4845	99.1852	99.2281	99.4854	99.6564	99.6564	99.8282		100	100	99.635	99.6503	99.6564	99.4764	99.4662	99.4774	99.4718	99.4845	99.4845	99.4774	99.1409	99.3127	99.4845	99.4845	98.8832	99.4845	99.4845	99.4845	99.3127	95.2462	95.7555	95.7555	95.5857	95.5857	95.7555	95.5433	95.6058	95.7555	96.2003	96.2162	95.7555	94.4585	96.0951	96.0951
NRRL 66450	98.9691	99.5402	99.4575	99.4565	97.6804	99.4845	99.1852	99.2281	99.4854	99.6564	99.6564	99.8282	100		100	99.635	99.6503	99.6564	99.4764	99.4662	99.4774	99.4718	99.4845	99.4845	99.4774	99.1409	99.3127	99.4845	99.4845	98.8832	99.4845	99.4845	99.4845	99.3127	95.2462	95.7555	95.7555	95.5857	95.5857	95.7555	95.5433	95.6058	95.7555	96.2003	96.2162	95.7555	94.4585	96.0951	96.0951
NRRL 66453	98.9691	99.5402	99.4575	99.4565	97.6804	99.4845	99.1852	99.2281	99.4854	99.6564	99.6564	99.8282	100	100		99.635	99.6503	99.6564	99.4764	99.4662	99.4774	99.4718	99.4845	99.4845	99.4774	99.1409	99.3127	99.4845	99.4845	98.8832	99.4845	99.4845	99.4845	99.3127	95.2462	95.7555	95.7555	95.5857	95.5857	95.7555	95.5433	95.6058	95.7555	96.2003	96.2162	95.7555	94.4585	96.0951	96.0951
NRRL 66429	99.2701	100	99.8073	99.8069	97.5365	99.4526	99.2714	99.4536	99.4536	99.635	99.635	99.8175	99.635	99.635	99.635		100	100	99.8175	99.8175	99.8175	99.8175	99.8175	99.8175	99.8175	99.4526	99.635	99.8175	99.8175	99.1788	99.8175	99.8175	99.8175	99.635	95.8559	95.8559	95.8559	95.6757	95.6757	95.8559	95.6306	95.7207	95.8559	96.3964	96.2162	95.8559	94.8291	96.2162	96.2162
NRRL 66452	99.3007	100	99.8158	99.8155	97.6399	99.4755	99.3019	99.3455	99.4764	99.6503	99.6503	99.8252	99.6503	99.6503	99.6503	100		100	99.8252	99.8221	99.8252	99.8239	99.8252	99.8252	99.8252	99.4755	99.6503	99.8252	99.8252	99.2133	99.8252	99.8252	99.8252	99.6503	94.9914	95.5095	95.5095	95.3368	95.3368	95.5095	95.2936	95.38	95.5095	96.2003	96.2162	95.5095	94.3632	96.0276	96.0276
NRRL 66432	99.3127	100	99.8192	99.8188	97.6804	99.4845	99.1852	99.2281	99.4854	99.6564	99.6564	99.8282	99.6564	99.6564	99.6564	100	100		99.8255	99.8221	99.8258	99.8239	99.8282	99.8282	99.8258	99.4845	99.6564	99.8282	99.8282	99.2268	99.8282	99.8282	99.8282	99.6564	95.0764	95.5857	95.5857	95.416	95.416	95.5857	95.3735	95.4352	95.5857	96.2003	96.2162	95.5857	94.4585	96.0951	96.0951
NRRL 31883	99.1274	99.7653	99.6324	100	97.4695	99.3019	98.9983	99.0418	99.3031	99.4764	99.4764	99.651	99.4764	99.4764	99.4764	99.8175	99.8252	99.8255		100	100	100	100	99.651	99.651	99.3019	99.4764	99.651	99.651	99.0401	100	100	100	99.8252	95.1641	95.6822	95.6822	95.5095	95.5095	95.6822	95.1293	95.5527	95.6822	96.3668	96.3899	95.6822	94.5353	96.2003	96.2003
NRRL 66415	99.1103	99.759	99.6248	100	97.4199	99.2883	99.1119	99.2895	99.2895	99.4662	99.4662	99.6441	99.4662	99.4662	99.4662	99.8175	99.8221	99.8221	100		100	100	100	99.6441	99.6441	99.2883	99.4662	99.6441	99.6441	99.0214	100	100	100	99.8217	95.2465	95.7746	95.7746	95.5986	95.5986	95.7746	95.2109	95.6426	95.7746	96.3028	96.3899	95.7746	94.6053	96.1268	96.1268
NRRL 66446	99.1289	99.7658	99.633	100	97.4739	99.3031	99	99.0435	99.3043	99.4774	99.4774	99.6516	99.4774	99.4774	99.4774	99.8175	99.8252	99.8258	100	100		100	100	99.6516	99.6516	99.3031	99.4774	99.6516	99.6516	99.0418	100	100	100	99.8255	95.1724	95.6897	95.6897	95.5172	95.5172	95.6897	95.1377	95.5603	95.6897	96.3668	96.3899	95.6897	94.5447	96.2069	96.2069
NRRL 66423	99.1197	99.7625	99.6289	100	97.4472	99.2958	99.1213	99.297	99.297	99.4718	99.4718	99.6479	99.4718	99.4718	99.4718	99.8175	99.8239	99.8239	100	100	100		100	99.6479	99.6479	99.2958	99.4718	99.6479	99.6479	99.0317	100	100	100	99.8236	95.122	95.6446	95.6446	95.4704	95.4704	95.6446	95.087	95.5139	95.6446	96.3415	96.3899	95.6446	94.4878	96.1672	96.1672
NRRL 66448	99.1409	99.7701	99.6383	100	97.5086	99.3127	99.0137	99.0566	99.3139	99.4845	99.4845	99.6564	99.4845	99.4845	99.4845	99.8175	99.8252	99.8282	100	100	100	100		99.6564	99.6516	99.3127	99.4845	99.6564	99.6564	99.055	100	100	100	99.8279	95.2381	95.7483	95.7483	95.5782	95.5782	95.7483	95.2037	95.5983	95.7483	96.3668	96.3899	95.7483	94.6186	96.2585	96.2585
NRRL 66426	99.4845	99.7701	100	99.6377	97.5086	99.3127	99.0137	99.0566	99.3139	99.4845	99.4845	99.6564	99.4845	99.4845	99.4845	99.8175	99.8252	99.8282	99.651	99.6441	99.6516	99.6479	99.6564		100	99.6564	99.8282	100	100	99.2268	99.6564	99.6564	99.6564	99.4845	94.9066	95.416	95.416	95.2462	95.2462	95.416	95.2037	95.2645	95.416	96.0276	96.036	95.416	94.2893	95.9253	95.9253
NRRL 66437	99.4774	99.7658	100	99.6324	97.4739	99.3031	99	99.0435	99.3043	99.4774	99.4774	99.6516	99.4774	99.4774	99.4774	99.8175	99.8252	99.8258	99.651	99.6441	99.6516	99.6479	99.6516	100		99.6516	99.8258	100	100	99.216	99.6516	99.6516	99.6516	99.4774	94.8365	95.3528	95.3528	95.1807	95.1807	95.3528	95.1377	95.2238	95.3528	96.0276	96.036	95.3528	94.211	95.8692	95.8692
NRRL 66445	99.1409	99.5402	99.6383	99.2754	97.1649	98.9691	98.6707	98.7136	98.9708	99.1409	99.1409	99.3127	99.1409	99.1409	99.1409	99.4526	99.4755	99.4845	99.3019	99.2883	99.3031	99.2958	99.3127	99.6564	99.6516		99.4845	99.6564	99.6564	98.8832	99.3127	99.3127	99.3127	99.1409	94.5671	95.0764	95.0764	94.9066	94.9066	95.0764	94.8642	94.9232	95.0764	95.6822	95.6757	95.0764	93.9509	95.5857	95.5857
NRRL 66421	99.3127	99.7701	99.8192	99.4565	97.3368	99.1409	98.8422	98.8851	99.1424	99.3127	99.3127	99.4845	99.3127	99.3127	99.3127	99.635	99.6503	99.6564	99.4764	99.4662	99.4774	99.4718	99.4845	99.8282	99.8258	99.4845		99.8282	99.8282	99.055	99.4845	99.4845	99.4845	99.3127	94.7368	95.2462	95.2462	95.0764	95.0764	95.2462	95.034	95.0939	95.2462	95.8549	95.8559	95.2462	94.1201	95.7555	95.7555
NRRL 66427	99.4845	99.7701	100	99.6377	97.5086	99.3127	99.0137	99.0566	99.3139	99.4845	99.4845	99.6564	99.4845	99.4845	99.4845	99.8175	99.8252	99.8282	99.651	99.6441	99.6516	99.6479	99.6564	100	100	99.6564	99.8282		100	99.2268	99.6564	99.6564	99.6564	99.4845	94.9066	95.416	95.416	95.2462	95.2462	95.416	95.2037	95.2645	95.416	96.0276	96.036	95.416	94.2893	95.9253	95.9253
NRRL 66447	99.4845	99.7701	100	99.6377	97.5086	99.3127	99.0137	99.0566	99.3139	99.4845	99.4845	99.6564	99.4845	99.4845	99.4845	99.8175	99.8252	99.8282	99.651	99.6441	99.6516	99.6479	99.6564	100	100	99.6564	99.8282	100		99.2268	99.6564	99.6564	99.6564	99.4845	94.9066	95.416	95.416	95.2462	95.2462	95.416	95.2037	95.2645	95.416	96.0276	96.036	95.416	94.2893	95.9253	95.9253
NRRL 66425	98.7113	98.9655	99.1863	99.0036	96.9072	98.7113	98.4134	98.4563	98.7136	98.8832	98.8832	99.055	98.8832	98.8832	98.8832	99.1788	99.2133	99.2268	99.0401	99.0214	99.0418	99.0317	99.055	99.2268	99.216	98.8832	99.055	99.2268	99.2268		99.055	99.055	99.055	98.8832	94.4822	94.9915	94.9915	94.8217	94.8217	94.9915	94.7793	94.8379	94.9915	95.5959	95.7658	94.9915	93.8663	95.5008	95.5008
NRRL 66444	99.1409	99.7701	99.6383	100	97.5086	99.3127	99.0137	99.0566	99.3139	99.4845	99.4845	99.6564	99.4845	99.4845	99.4845	99.8175	99.8252	99.8282	100	100	100	100	100	99.6564	99.6516	99.3127	99.4845	99.6564	99.6564	99.055		100	100	99.8279	95.2381	95.7483	95.7483	95.5782	95.5782	95.7483	95.2037	95.5983	95.7483	96.3668	96.3899	95.7483	94.6186	96.2585	96.2585
NRRL 66439	99.1409	99.7701	99.6383	100	97.5086	99.3127	99.0137	99.0566	99.3139	99.4845	99.4845	99.6564	99.4845	99.4845	99.4845	99.8175	99.8252	99.8282	100	100	100	100	100	99.6564	99.6516	99.3127	99.4845	99.6564	99.6564	99.055	100		100	99.8279	95.2381	95.7483	95.7483	95.5782	95.5782	95.7483	95.2037	95.5983	95.7483	96.3668	96.3899	95.7483	94.6186	96.2585	96.2585
NRRL 66430	99.1409	99.7701	99.6383	100	97.5086	99.3127	99.0137	99.0566	99.3139	99.4845	99.4845	99.6564	99.4845	99.4845	99.4845	99.8175	99.8252	99.8282	100	100	100	100	100	99.6564	99.6516	99.3127	99.4845	99.6564	99.6564	99.055	100	100		99.8279	95.2381	95.7483	95.7483	95.5782	95.5782	95.7483	95.2037	95.5983	95.7483	96.3668	96.3899	95.7483	94.6186	96.2585	96.2585
NRRL 66418	98.9691	99.5402	99.4575	99.8185	97.3368	99.1409	98.8422	98.8851	99.1424	99.3127	99.3127	99.4845	99.3127	99.3127	99.3127	99.635	99.6503	99.6564	99.8252	99.8217	99.8255	99.8236	99.8279	99.4845	99.4774	99.1409	99.3127	99.4845	99.4845	98.8832	99.8279	99.8279	99.8279		95.4082	95.9184	95.9184	95.7483	95.7483	95.9184	95.3735	95.7692	95.9184	96.5398	96.5704	95.9184	94.7881	96.4286	96.4286
NRRL 22944 AF160280	94.5671	95.0226	95.1786	95.5197	92.9542	94.7368	94.6095	94.652	94.9066	94.9066	94.9066	95.0764	95.2462	95.2462	95.2462	95.8559	94.9914	95.0764	95.1641	95.2465	95.1724	95.122	95.2381	94.9066	94.8365	94.5671	94.7368	94.9066	94.9066	94.4822	95.2381	95.2381	95.2381	95.4082		99.4898	99.4898	99.1497	99.1497	99.3197	98.7691	98.5043	98.6395	98.6159	98.917	98.6395	97.161	98.4694	98.4694
NRRL 66422	95.0764	95.7014	95.7143	96.0573	93.4635	95.2462	95.1188	95.1613	95.416	95.416	95.416	95.5857	95.7555	95.7555	95.7555	95.8559	95.5095	95.5857	95.6822	95.7746	95.6897	95.6446	95.7483	95.416	95.3528	95.0764	95.2462	95.416	95.416	94.9915	95.7483	95.7483	95.7483	95.9184	99.4898		100	99.6599	99.6599	99.8299	99.2784	99.0171	99.1497	99.1349	98.917	99.1497	97.6695	98.9796	98.9796
NRRL 66424	95.0764	95.7014	95.7143	96.0573	93.4635	95.2462	95.1188	95.1613	95.416	95.416	95.416	95.5857	95.7555	95.7555	95.7555	95.8559	95.5095	95.5857	95.6822	95.7746	95.6897	95.6446	95.7483	95.416	95.3528	95.0764	95.2462	95.416	95.416	94.9915	95.7483	95.7483	95.7483	95.9184	99.4898	100		99.6599	99.6599	99.8299	99.2784	99.0171	99.1497	99.1349	98.917	99.1497	97.6695	98.9796	98.9796
NRRL 31915	94.9066	95.4751	95.5357	95.8781	93.2937	95.0764	94.9491	94.9915	95.2462	95.2462	95.2462	95.416	95.5857	95.5857	95.5857	95.6757	95.3368	95.416	95.5095	95.5986	95.5172	95.4704	95.5782	95.2462	95.1807	94.9066	95.0764	95.2462	95.2462	94.8217	95.5782	95.5782	95.5782	95.7483	99.1497	99.6599	99.6599		100	99.8299	99.2784	99.0171	99.1497	99.1349	98.917	99.1497	97.6695	98.9796	98.9796
NRRL 66420	94.9066	95.4751	95.5357	95.8781	93.2937	95.0764	94.9491	94.9915	95.2462	95.2462	95.2462	95.416	95.5857	95.5857	95.5857	95.6757	95.3368	95.416	95.5095	95.5986	95.5172	95.4704	95.5782	95.2462	95.1807	94.9066	95.0764	95.2462	95.2462	94.8217	95.5782	95.5782	95.5782	95.7483	99.1497	99.6599	99.6599	100		99.8299	99.2784	99.0171	99.1497	99.1349	98.917	99.1497	97.6695	98.9796	98.9796
NRRL 66442	95.0764	95.7014	95.7143	96.0573	93.4635	95.2462	95.1188	95.1613	95.416	95.416	95.416	95.5857	95.7555	95.7555	95.7555	95.8559	95.5095	95.5857	95.6822	95.7746	95.6897	95.6446	95.7483	95.416	95.3528	95.0764	95.2462	95.416	95.416	94.9915	95.7483	95.7483	95.7483	95.9184	99.3197	99.8299	99.8299	99.8299	99.8299		99.4482	99.188	99.3197	99.308	99.0975	99.3197	97.839	99.1497	99.1497
NRRL 31860	94.8642	95.9276	95.4911	95.483	93.4211	95.034	94.9066	94.9491	95.2037	95.2037	95.2037	95.3735	95.5433	95.5433	95.5433	95.6306	95.2936	95.3735	95.1293	95.2109	95.1377	95.087	95.2037	95.2037	95.1377	94.8642	95.034	95.2037	95.2037	94.7793	95.2037	95.2037	95.2037	95.3735	98.7691	99.2784	99.2784	99.2784	99.2784	99.4482		98.6348	98.7691	98.7478	98.5135	98.7691	97.6734	98.5993	98.5993
NRRL 31867	94.9232	95.2164	95.377	95.7207	93.302	95.0939	94.9659	95.0085	95.2645	95.2645	95.2645	95.4352	95.6058	95.6058	95.6058	95.7207	95.38	95.4352	95.5527	95.6426	95.5603	95.5139	95.5983	95.2645	95.2238	94.9232	95.0939	95.2645	95.2645	94.8379	95.5983	95.5983	95.5983	95.7692	98.5043	99.0171	99.0171	99.0171	99.0171	99.188	98.6348		99.5299	99.1782	98.9621	99.188	97.8279	99.0171	99.0171
NRRL 66419	95.0764	95.2489	95.5357	95.8781	93.4635	95.2462	95.1188	95.1613	95.416	95.416	95.416	95.5857	95.7555	95.7555	95.7555	95.8559	95.5095	95.5857	95.6822	95.7746	95.6897	95.6446	95.7483	95.416	95.3528	95.0764	95.2462	95.416	95.416	94.9915	95.7483	95.7483	95.7483	95.9184	98.6395	99.1497	99.1497	99.1497	99.1497	99.3197	98.7691	99.5299		99.308	99.0975	99.3197	97.839	99.1497	99.1497
NRRL 66416	95.6822	96.0648	96.1818	96.5328	93.8687	95.6822	95.6822	95.7254	95.8549	95.8549	95.8549	96.0276	96.2003	96.2003	96.2003	96.3964	96.2003	96.2003	96.3668	96.3028	96.3668	96.3415	96.3668	96.0276	96.0276	95.6822	95.8549	96.0276	96.0276	95.5959	96.3668	96.3668	96.3668	96.5398	98.6159	99.1349	99.1349	99.1349	99.1349	99.308	98.7478	99.1782	99.308		99.639	99.308	98.1466	99.827	99.827
NRRL 66451	95.6757	96.0784	96.1977	96.5649	93.7838	95.6757	95.6757	95.8559	95.8559	95.8559	95.8559	96.036	96.2162	96.2162	96.2162	96.2162	96.2162	96.2162	96.3899	96.3899	96.3899	96.3899	96.3899	96.036	96.036	95.6757	95.8559	96.036	96.036	95.7658	96.3899	96.3899	96.3899	96.5704	98.917	98.917	98.917	98.917	98.917	99.0975	98.5135	98.9621	99.0975	99.639		99.0975	98.0631	99.4585	99.4585
NRRL 31871	95.0764	95.2489	95.5357	95.8781	93.4635	95.2462	95.1188	95.1613	95.416	95.416	95.416	95.5857	95.7555	95.7555	95.7555	95.8559	95.5095	95.5857	95.6822	95.7746	95.6897	95.6446	95.7483	95.416	95.3528	95.0764	95.2462	95.416	95.416	94.9915	95.7483	95.7483	95.7483	95.9184	98.6395	99.1497	99.1497	99.1497	99.1497	99.3197	98.7691	99.188	99.3197	99.308	99.0975		97.839	99.1497	99.1497
NRRL 31865	93.9509	95.1014	94.3505	94.6875	92.3435	93.9509	93.824	93.8663	94.1201	94.1201	94.1201	94.2893	94.4585	94.4585	94.4585	94.8291	94.3632	94.4585	94.5353	94.6053	94.5447	94.4878	94.6186	94.2893	94.211	93.9509	94.1201	94.2893	94.2893	93.8663	94.6186	94.6186	94.6186	94.7881	97.161	97.6695	97.6695	97.6695	97.6695	97.839	97.6734	97.8279	97.839	98.1466	98.0631	97.839		98.0085	98.0085
NRRL 31866	95.5857	95.9276	96.0714	96.4158	93.8031	95.5857	95.4584	95.5008	95.7555	95.7555	95.7555	95.9253	96.0951	96.0951	96.0951	96.2162	96.0276	96.0951	96.2003	96.1268	96.2069	96.1672	96.2585	95.9253	95.8692	95.5857	95.7555	95.9253	95.9253	95.5008	96.2585	96.2585	96.2585	96.4286	98.4694	98.9796	98.9796	98.9796	98.9796	99.1497	98.5993	99.0171	99.1497	99.827	99.4585	99.1497	98.0085		100
NRRL 66417	95.5857	95.9276	96.0714	96.4158	93.8031	95.5857	95.4584	95.5008	95.7555	95.7555	95.7555	95.9253	96.0951	96.0951	96.0951	96.2162	96.0276	96.0951	96.2003	96.1268	96.2069	96.1672	96.2585	95.9253	95.8692	95.5857	95.7555	95.9253	95.9253	95.5008	96.2585	96.2585	96.2585	96.4286	98.4694	98.9796	98.9796	98.9796	98.9796	99.1497	98.5993	99.0171	99.1497	99.827	99.4585	99.1497	98.0085	100
Percent identity matrix based on ClustalW alignment for Fusarium fujikuroi isolates obtained from southeastern U.S. winegrapes and deposited into the ARS Culture Collection (NRRL 664XX) compared to reference strains (bold font).
	NRRL 31883	NRRL 66415	NRRL 66446	NRRL 66423	NRRL 66430	NRRL 66439	NRRL 66444	NRRL 66448	NRRL 66418	NRRL 66426	NRRL 66437	NRRL 66445	NRRL 66421	NRRL 66447	NRRL 66427	NRRL 66425	NRRL 66429	NRRL 66452	NRRL 66432	NRRL 5538	NRRL 66443	NRRL 66450	NRRL 66453	NRRL 22012	NRRL 31879	NRRL 31886	NRRL 31857	NRRL 31862	NRRL 13998	NRRL 66438	NRRL 66441	NRRL 66431	NRRL 66428	NRRL 13566
NRRL 31883		100	100	100	100	100	100	100	99.8252	99.651	99.651	99.3019	99.4764	99.651	99.651	99.0401	99.8175	99.8252	99.8255	99.651	99.4764	99.4764	99.4764	99.4764	99.4764	99.3031	98.9983	99.0418	99.3019	99.1274	99.7653	99.6324	100	97.4695
NRRL 66415	100		100	100	100	100	100	100	99.8217	99.6441	99.6441	99.2883	99.4662	99.6441	99.6441	99.0214	99.8175	99.8221	99.8221	99.6441	99.4662	99.4662	99.4662	99.4662	99.4662	99.2895	99.1119	99.2895	99.2883	99.1103	99.759	99.6248	100	97.4199
NRRL 66446	100	100		100	100	100	100	100	99.8255	99.6516	99.6516	99.3031	99.4774	99.6516	99.6516	99.0418	99.8175	99.8252	99.8258	99.6516	99.4774	99.4774	99.4774	99.4774	99.4774	99.3043	99	99.0435	99.3031	99.1289	99.7658	99.633	100	97.4739
NRRL 66423	100	100	100		100	100	100	100	99.8236	99.6479	99.6479	99.2958	99.4718	99.6479	99.6479	99.0317	99.8175	99.8239	99.8239	99.6479	99.4718	99.4718	99.4718	99.4718	99.4718	99.297	99.1213	99.297	99.2958	99.1197	99.7625	99.6289	100	97.4472
NRRL 66430	100	100	100	100		100	100	100	99.8279	99.6564	99.6516	99.3127	99.4845	99.6564	99.6564	99.055	99.8175	99.8252	99.8282	99.6564	99.4845	99.4845	99.4845	99.4845	99.4845	99.3139	99.0137	99.0566	99.3127	99.1409	99.7701	99.6383	100	97.5086
NRRL 66439	100	100	100	100	100		100	100	99.8279	99.6564	99.6516	99.3127	99.4845	99.6564	99.6564	99.055	99.8175	99.8252	99.8282	99.6564	99.4845	99.4845	99.4845	99.4845	99.4845	99.3139	99.0137	99.0566	99.3127	99.1409	99.7701	99.6383	100	97.5086
NRRL 66444	100	100	100	100	100	100		100	99.8279	99.6564	99.6516	99.3127	99.4845	99.6564	99.6564	99.055	99.8175	99.8252	99.8282	99.6564	99.4845	99.4845	99.4845	99.4845	99.4845	99.3139	99.0137	99.0566	99.3127	99.1409	99.7701	99.6383	100	97.5086
NRRL 66448	100	100	100	100	100	100	100		99.8279	99.6564	99.6516	99.3127	99.4845	99.6564	99.6564	99.055	99.8175	99.8252	99.8282	99.6564	99.4845	99.4845	99.4845	99.4845	99.4845	99.3139	99.0137	99.0566	99.3127	99.1409	99.7701	99.6383	100	97.5086
NRRL 66418	99.8252	99.8217	99.8255	99.8236	99.8279	99.8279	99.8279	99.8279		99.4845	99.4774	99.1409	99.3127	99.4845	99.4845	98.8832	99.635	99.6503	99.6564	99.4845	99.3127	99.3127	99.3127	99.3127	99.3127	99.1424	98.8422	98.8851	99.1409	98.9691	99.5402	99.4575	99.8185	97.3368
NRRL 66426	99.651	99.6441	99.6516	99.6479	99.6564	99.6564	99.6564	99.6564	99.4845		100	99.6564	99.8282	100	100	99.2268	99.8175	99.8252	99.8282	99.6564	99.4845	99.4845	99.4845	99.4845	99.4845	99.3139	99.0137	99.0566	99.3127	99.4845	99.7701	100	99.6377	97.5086
NRRL 66437	99.651	99.6441	99.6516	99.6479	99.6516	99.6516	99.6516	99.6516	99.4774	100		99.6516	99.8258	100	100	99.216	99.8175	99.8252	99.8258	99.6516	99.4774	99.4774	99.4774	99.4774	99.4774	99.3043	99	99.0435	99.3031	99.4774	99.7658	100	99.6324	97.4739
NRRL 66445	99.3019	99.2883	99.3031	99.2958	99.3127	99.3127	99.3127	99.3127	99.1409	99.6564	99.6516		99.4845	99.6564	99.6564	98.8832	99.4526	99.4755	99.4845	99.3127	99.1409	99.1409	99.1409	99.1409	99.1409	98.9708	98.6707	98.7136	98.9691	99.1409	99.5402	99.6383	99.2754	97.1649
NRRL 66421	99.4764	99.4662	99.4774	99.4718	99.4845	99.4845	99.4845	99.4845	99.3127	99.8282	99.8258	99.4845		99.8282	99.8282	99.055	99.635	99.6503	99.6564	99.4845	99.3127	99.3127	99.3127	99.3127	99.3127	99.1424	98.8422	98.8851	99.1409	99.3127	99.7701	99.8192	99.4565	97.3368
NRRL 66447	99.651	99.6441	99.6516	99.6479	99.6564	99.6564	99.6564	99.6564	99.4845	100	100	99.6564	99.8282		100	99.2268	99.8175	99.8252	99.8282	99.6564	99.4845	99.4845	99.4845	99.4845	99.4845	99.3139	99.0137	99.0566	99.3127	99.4845	99.7701	100	99.6377	97.5086
NRRL 66427	99.651	99.6441	99.6516	99.6479	99.6564	99.6564	99.6564	99.6564	99.4845	100	100	99.6564	99.8282	100		99.2268	99.8175	99.8252	99.8282	99.6564	99.4845	99.4845	99.4845	99.4845	99.4845	99.3139	99.0137	99.0566	99.3127	99.4845	99.7701	100	99.6377	97.5086
NRRL 66425	99.0401	99.0214	99.0418	99.0317	99.055	99.055	99.055	99.055	98.8832	99.2268	99.216	98.8832	99.055	99.2268	99.2268		99.1788	99.2133	99.2268	99.055	98.8832	98.8832	98.8832	98.8832	98.8832	98.7136	98.4134	98.4563	98.7113	98.7113	98.9655	99.1863	99.0036	96.9072
NRRL 66429	99.8175	99.8175	99.8175	99.8175	99.8175	99.8175	99.8175	99.8175	99.635	99.8175	99.8175	99.4526	99.635	99.8175	99.8175	99.1788		100	100	99.8175	99.635	99.635	99.635	99.635	99.635	99.4536	99.2714	99.4536	99.4526	99.2701	100	99.8073	99.8069	97.5365
NRRL 66452	99.8252	99.8221	99.8252	99.8239	99.8252	99.8252	99.8252	99.8252	99.6503	99.8252	99.8252	99.4755	99.6503	99.8252	99.8252	99.2133	100		100	99.8252	99.6503	99.6503	99.6503	99.6503	99.6503	99.4764	99.3019	99.3455	99.4755	99.3007	100	99.8158	99.8155	97.6399
NRRL 66432	99.8255	99.8221	99.8258	99.8239	99.8282	99.8282	99.8282	99.8282	99.6564	99.8282	99.8258	99.4845	99.6564	99.8282	99.8282	99.2268	100	100		99.8282	99.6564	99.6564	99.6564	99.6564	99.6564	99.4854	99.1852	99.2281	99.4845	99.3127	100	99.8192	99.8188	97.6804
NRRL 5538	99.651	99.6441	99.6516	99.6479	99.6564	99.6564	99.6564	99.6564	99.4845	99.6564	99.6516	99.3127	99.4845	99.6564	99.6564	99.055	99.8175	99.8252	99.8282		99.8282	99.8282	99.8282	99.8282	99.8282	99.6569	99.3568	99.3997	99.6564	99.1409	99.7701	99.6383	99.6377	97.8522
NRRL 66443	99.4764	99.4662	99.4774	99.4718	99.4845	99.4845	99.4845	99.4845	99.3127	99.4845	99.4774	99.1409	99.3127	99.4845	99.4845	98.8832	99.635	99.6503	99.6564	99.8282		100	100	99.6564	99.6564	99.4854	99.1852	99.2281	99.4845	98.9691	99.5402	99.4575	99.4565	97.6804
NRRL 66450	99.4764	99.4662	99.4774	99.4718	99.4845	99.4845	99.4845	99.4845	99.3127	99.4845	99.4774	99.1409	99.3127	99.4845	99.4845	98.8832	99.635	99.6503	99.6564	99.8282	100		100	99.6564	99.6564	99.4854	99.1852	99.2281	99.4845	98.9691	99.5402	99.4575	99.4565	97.6804
NRRL 66453	99.4764	99.4662	99.4774	99.4718	99.4845	99.4845	99.4845	99.4845	99.3127	99.4845	99.4774	99.1409	99.3127	99.4845	99.4845	98.8832	99.635	99.6503	99.6564	99.8282	100	100		99.6564	99.6564	99.4854	99.1852	99.2281	99.4845	98.9691	99.5402	99.4575	99.4565	97.6804
NRRL 22012	99.4764	99.4662	99.4774	99.4718	99.4845	99.4845	99.4845	99.4845	99.3127	99.4845	99.4774	99.1409	99.3127	99.4845	99.4845	98.8832	99.635	99.6503	99.6564	99.8282	99.6564	99.6564	99.6564		100	99.8285	99.5283	99.5712	99.8473	98.9691	99.5402	99.4575	99.4565	98.0241
NRRL 31879	99.4764	99.4662	99.4774	99.4718	99.4845	99.4845	99.4845	99.4845	99.3127	99.4845	99.4774	99.1409	99.3127	99.4845	99.4845	98.8832	99.635	99.6503	99.6564	99.8282	99.6564	99.6564	99.6564	100		99.8285	99.5283	99.5712	99.8282	98.9691	99.5402	99.4575	99.4565	98.0241
NRRL 31886	99.3031	99.2895	99.3043	99.297	99.3139	99.3139	99.3139	99.3139	99.1424	99.3139	99.3043	98.9708	99.1424	99.3139	99.3139	98.7136	99.4536	99.4764	99.4854	99.6569	99.4854	99.4854	99.4854	99.8285	99.8285		99.6998	99.7427	99.6569	98.7993	99.3119	99.278	99.2767	97.8559
NRRL 31857	98.9983	99.1119	99	99.1213	99.0137	99.0137	99.0137	99.0137	98.8422	99.0137	99	98.6707	98.8422	99.0137	99.0137	98.4134	99.2714	99.3019	99.1852	99.3568	99.1852	99.1852	99.1852	99.5283	99.5283	99.6998		99.5712	99.6998	98.4991	98.9106	98.9621	98.9602	97.8988
NRRL 31862	99.0418	99.2895	99.0435	99.297	99.0566	99.0566	99.0566	99.0566	98.8851	99.0566	99.0435	98.7136	98.8851	99.0566	99.0566	98.4563	99.4536	99.3455	99.2281	99.3997	99.2281	99.2281	99.2281	99.5712	99.5712	99.7427	99.5712		99.3997	98.542	98.9679	99.0072	99.0054	97.5986
NRRL 13998	99.3019	99.2883	99.3031	99.2958	99.3127	99.3127	99.3127	99.3127	99.1409	99.3127	99.3031	98.9691	99.1409	99.3127	99.3127	98.7113	99.4526	99.4755	99.4845	99.6564	99.4845	99.4845	99.4845	99.8473	99.8282	99.6569	99.6998	99.3997		98.7973	99.3103	99.2767	99.2754	98.1959
NRRL 66438	99.1274	99.1103	99.1289	99.1197	99.1409	99.1409	99.1409	99.1409	98.9691	99.4845	99.4774	99.1409	99.3127	99.4845	99.4845	98.7113	99.2701	99.3007	99.3127	99.1409	98.9691	98.9691	98.9691	98.9691	98.9691	98.7993	98.4991	98.542	98.7973		99.7701	99.8644	99.6377	97.122
NRRL 66441	99.7653	99.759	99.7658	99.7625	99.7701	99.7701	99.7701	99.7701	99.5402	99.7701	99.7658	99.5402	99.7701	99.7701	99.7701	98.9655	100	100	100	99.7701	99.5402	99.5402	99.5402	99.5402	99.5402	99.3119	98.9106	98.9679	99.3103	99.7701		99.7701	99.7701	98.2184
NRRL 66431	99.6324	99.6248	99.633	99.6289	99.6383	99.6383	99.6383	99.6383	99.4575	100	100	99.6383	99.8192	100	100	99.1863	99.8073	99.8158	99.8192	99.6383	99.4575	99.4575	99.4575	99.4575	99.4575	99.278	98.9621	99.0072	99.2767	99.8644	99.7701		99.6377	97.6944
NRRL 66428	100	100	100	100	100	100	100	100	99.8185	99.6377	99.6324	99.2754	99.4565	99.6377	99.6377	99.0036	99.8069	99.8155	99.8188	99.6377	99.4565	99.4565	99.4565	99.4565	99.4565	99.2767	98.9602	99.0054	99.2754	99.6377	99.7701	99.6377		97.6902
NRRL 13566	97.4695	97.4199	97.4739	97.4472	97.5086	97.5086	97.5086	97.5086	97.3368	97.5086	97.4739	97.1649	97.3368	97.5086	97.5086	96.9072	97.5365	97.6399	97.6804	97.8522	97.6804	97.6804	97.6804	98.0241	98.0241	97.8559	97.8988	97.5986	98.1959	97.122	98.2184	97.6944	97.6902
Percent identity matrix based on ClustalW alignment for non-curated Fusarium fujikuroi isolates obtained from southeastern U.S. winegrapes (SLB 6XXX) compared to reference strains (bold font).
	SLB 6064	SLB 6258	NRRL 5538 HF679028	SLB 6184	SLB 6200	SLB 6140	SLB 6092	SLB 6239	SLB 6284	SLB 6278	SLB 6240	SLB 6196	SLB 6257	SLB 6270	SLB 6020	SLB 6163	SLB 6177	SLB 6072	NRRL 22012 JN092354	SLB 6300	SLB 6005	SLB 6109	SLB 6172	SLB 6190	SLB 6174	SLB 6317	SLB 6204
SLB 6064		100	99.8	99.2	99.5	99.5	99.4	100	99.6	100	99.6	99.3	99.7	99.5	99.7	99.2	99.7	99.7	99.7	100	99.3	99.6	99.5	99.6	99.6	99.5	99.5
SLB 6258	100		99.8	99.2	99.5	99.5	99.4	100	99.6	100	99.6	99.3	99.7	99.5	99.7	99.2	99.7	99.7	99.7	100	99.3	99.6	99.5	99.6	99.6	99.5	99.5
NRRL 5538 HF679028	99.8	99.8		99.3	99.7	99.7	99.6	99.8	99.4	99.7	99.8	99.5	99.8	99.7	99.8	99.3	99.8	99.8	99.8	99.8	99.5	99.8	99.6	99.8	99.8	99.6	99.7
SLB 6184	99.2	99.2	99.3		99.7	99.7	99.6	99.1	98.7	99.2	99.5	99.1	99.5	99.3	99.5	99.3	99.5	99.5	99.2	99.1	99.1	99.4	99.3	99.5	99.5	99.3	99.3
SLB 6200	99.5	99.5	99.7	99.7		100	100	99.5	99	99.2	99.8	99.5	99.8	99.7	99.8	99.7	99.8	99.8	99.5	99.4	99.5	99.8	99.6	99.8	99.8	99.6	99.7
SLB 6140	99.5	99.5	99.7	99.7	100		100	99.5	99	99.2	99.8	99.5	99.8	99.7	99.8	99.7	99.8	99.8	99.5	99.4	99.5	99.8	99.6	99.8	99.8	99.6	99.7
SLB 6092	99.4	99.4	99.6	99.6	100	100		99.4	99	99.2	99.8	99.4	99.8	99.6	99.8	99.6	99.8	99.8	99.4	99.4	99.4	99.8	99.6	99.8	99.8	99.6	99.6
SLB 6239	100	100	99.8	99.1	99.5	99.5	99.4		99.6	100	99.6	99.3	99.6	99.5	99.7	99.1	99.6	99.6	99.7	100	99.2	99.6	99.4	99.6	99.6	99.4	99.5
SLB 6284	99.6	99.6	99.4	98.7	99	99	99	99.6		99.5	99.2	98.9	99.2	99	99.2	98.7	99.2	99.2	99.2	99.6	98.8	99.2	99	99.2	99.2	99	99
SLB 6278	100	100	99.7	99.2	99.2	99.2	99.2	100	99.5		99.5	99	99.5	99.2	99.5	99	99.5	99.5	99.5	100	99	99.5	99.2	99.5	99.5	99.2	99.2
SLB 6240	99.6	99.6	99.8	99.5	99.8	99.8	99.8	99.6	99.2	99.5		99.6	100	99.8	100	99.5	100	100	99.6	99.6	99.6	100	99.8	100	100	99.8	99.8
SLB 6196	99.3	99.3	99.5	99.1	99.5	99.5	99.4	99.3	98.9	99	99.6		99.6	99.5	99.6	99.1	99.6	99.6	99.3	99.2	99.2	99.6	99.4	99.6	99.6	99.4	99.4
SLB 6257	99.7	99.7	99.8	99.5	99.8	99.8	99.8	99.6	99.2	99.5	100	99.6		99.8	100	99.5	100	100	99.7	99.6	99.6	100	99.8	100	100	99.8	99.8
SLB 6270	99.5	99.5	99.7	99.3	99.7	99.7	99.6	99.5	99	99.2	99.8	99.5	99.8		99.8	99.3	99.8	99.8	99.5	99.4	99.8	99.8	100	99.8	99.8	100	100
SLB 6020	99.7	99.7	99.8	99.5	99.8	99.8	99.8	99.7	99.2	99.5	100	99.6	100	99.8		99.5	100	100	99.7	99.6	99.7	100	99.8	100	100	99.8	99.8
SLB 6163	99.2	99.2	99.3	99.3	99.7	99.7	99.6	99.1	98.7	99	99.5	99.1	99.5	99.3	99.5		99.5	99.5	99.2	99.1	99.1	99.5	99.3	99.5	99.5	99.3	99.3
SLB 6177	99.7	99.7	99.8	99.5	99.8	99.8	99.8	99.6	99.2	99.5	100	99.6	100	99.8	100	99.5		100	99.7	99.6	99.6	100	99.8	100	100	99.8	99.8
SLB 6072	99.7	99.7	99.8	99.5	99.8	99.8	99.8	99.6	99.2	99.5	100	99.6	100	99.8	100	99.5	100		99.7	99.6	99.6	100	99.8	100	100	99.8	99.8
NRRL 22012 JN092354	99.7	99.7	99.8	99.2	99.5	99.5	99.4	99.7	99.2	99.5	99.6	99.3	99.7	99.5	99.7	99.2	99.7	99.7		99.6	99.3	99.7	99.5	99.7	99.6	99.5	99.5
SLB 6300	100	100	99.8	99.1	99.4	99.4	99.4	100	99.6	100	99.6	99.2	99.6	99.4	99.6	99.1	99.6	99.6	99.6		99.3	99.6	99.4	99.6	99.6	99.4	99.4
SLB 6005	99.3	99.3	99.5	99.1	99.5	99.5	99.4	99.2	98.8	99	99.6	99.2	99.6	99.8	99.7	99.1	99.6	99.6	99.3	99.3		99.7	99.8	99.7	99.6	99.8	99.8
SLB 6109	99.6	99.6	99.8	99.4	99.8	99.8	99.8	99.6	99.2	99.5	100	99.6	100	99.8	100	99.5	100	100	99.7	99.6	99.7		99.8	100	100	99.8	99.8
SLB 6172	99.5	99.5	99.6	99.3	99.6	99.6	99.6	99.4	99	99.2	99.8	99.4	99.8	100	99.8	99.3	99.8	99.8	99.5	99.4	99.8	99.8		99.8	99.8	100	100
SLB 6190	99.6	99.6	99.8	99.5	99.8	99.8	99.8	99.6	99.2	99.5	100	99.6	100	99.8	100	99.5	100	100	99.7	99.6	99.7	100	99.8		100	99.8	99.8
SLB 6174	99.6	99.6	99.8	99.5	99.8	99.8	99.8	99.6	99.2	99.5	100	99.6	100	99.8	100	99.5	100	100	99.6	99.6	99.6	100	99.8	100		99.8	99.8
SLB 6317	99.5	99.5	99.6	99.3	99.6	99.6	99.6	99.4	99	99.2	99.8	99.4	99.8	100	99.8	99.3	99.8	99.8	99.5	99.4	99.8	99.8	100	99.8	99.8		100
SLB 6204	99.5	99.5	99.7	99.3	99.7	99.7	99.6	99.5	99	99.2	99.8	99.4	99.8	100	99.8	99.3	99.8	99.8	99.5	99.4	99.8	99.8	100	99.8	99.8	100
Percent identity matrix based on ClustalW alignment for Fusarium proliferatum isolates obtained from southeastern U.S. winegrapes and deposited into the ARS Culture Collection (NRRL 664XX) compared to reference strains (bold font).
	NRRL 22944 AF160280	NRRL 66422	NRRL 66424	NRRL 31915	NRRL 66420	NRRL 66442	NRRL 31866	NRRL 66417	NRRL 66416	NRRL 66451	NRRL 31867	NRRL 66419	NRRL 31871	NRRL 31860	NRRL 31865
NRRL 22944 AF160280		99.4898	99.4898	99.1497	99.1497	99.3197	98.4694	98.4694	98.6159	98.917	98.5043	98.6395	98.6395	98.7691	97.161
NRRL 66422	99.4898		100	99.6599	99.6599	99.8299	98.9796	98.9796	99.1349	98.917	99.0171	99.1497	99.1497	99.2784	97.6695
NRRL 66424	99.4898	100		99.6599	99.6599	99.8299	98.9796	98.9796	99.1349	98.917	99.0171	99.1497	99.1497	99.2784	97.6695
NRRL 31915	99.1497	99.6599	99.6599		100	99.8299	98.9796	98.9796	99.1349	98.917	99.0171	99.1497	99.1497	99.2784	97.6695
NRRL 66420	99.1497	99.6599	99.6599	100		99.8299	98.9796	98.9796	99.1349	98.917	99.0171	99.1497	99.1497	99.2784	97.6695
NRRL 66442	99.3197	99.8299	99.8299	99.8299	99.8299		99.1497	99.1497	99.308	99.0975	99.188	99.3197	99.3197	99.4482	97.839
NRRL 31866	98.4694	98.9796	98.9796	98.9796	98.9796	99.1497		100	99.827	99.4585	99.0171	99.1497	99.1497	98.5993	98.0085
NRRL 66417	98.4694	98.9796	98.9796	98.9796	98.9796	99.1497	100		99.827	99.4585	99.0171	99.1497	99.1497	98.5993	98.0085
NRRL 66416	98.6159	99.1349	99.1349	99.1349	99.1349	99.308	99.827	99.827		99.639	99.1782	99.308	99.308	98.7478	98.1466
NRRL 66451	98.917	98.917	98.917	98.917	98.917	99.0975	99.4585	99.4585	99.639		98.9621	99.0975	99.0975	98.5135	98.0631
NRRL 31867	98.5043	99.0171	99.0171	99.0171	99.0171	99.188	99.0171	99.0171	99.1782	98.9621		99.5299	99.188	98.6348	97.8279
NRRL 66419	98.6395	99.1497	99.1497	99.1497	99.1497	99.3197	99.1497	99.1497	99.308	99.0975	99.5299		99.3197	98.7691	97.839
NRRL 31871	98.6395	99.1497	99.1497	99.1497	99.1497	99.3197	99.1497	99.1497	99.308	99.0975	99.188	99.3197		98.7691	97.839
NRRL 31860	98.7691	99.2784	99.2784	99.2784	99.2784	99.4482	98.5993	98.5993	98.7478	98.5135	98.6348	98.7691	98.7691		97.6734
NRRL 31865	97.161	97.6695	97.6695	97.6695	97.6695	97.839	98.0085	98.0085	98.1466	98.0631	97.8279	97.839	97.839	97.6734
Percent identity matrix based on ClustalW alignment for non-curated Fusarium proliferatum isolates obtained from southeastern U.S. winegrapes (SLB 6XXX) compared to reference strain (bold font).
	NRRL 22944 AF160280	SLB 6038	SLB 6028	SLB 6061	SLB 6099	SLB 6115	SLB 6009	SLB 6046	SLB 6052	SLB 6022	SLB 6237	SLB 6322	SLB 6332	SLB 6327	SLB 6014
NRRL 22944 AF160280		100	99.5	99.5	100	100	100	100	99.5	99.4	99.3	97.8	98.3	98.3	98.6
SLB 6038	100		100	100	100	100	100	100	100	99.6	99.8	99.4	99.4	99.4	99.6
SLB 6028	99.5	100		100	100	100	100	100	100	99.4	99.8	98.6	98.8	98.8	99.1
SLB 6061	99.5	100	100		100	100	100	100	100	99.4	99.8	98.6	98.8	98.8	99.1
SLB 6099	100	100	100	100		100	100	100	100	99.4	99.8	98.8	98.9	99	99.3
SLB 6115	100	100	100	100	100		100	100	100	99.4	99.8	98.8	98.9	99	99.3
SLB 6009	100	100	100	100	100	100		100	100	99.7	99.7	98.8	98.9	98.9	99.5
SLB 6046	100	100	100	100	100	100	100		100	99.4	99.8	98.8	98.9	98.9	99.3
SLB 6052	99.5	100	100	100	100	100	100	100		99.4	99.8	98.9	98.9	98.9	99.3
SLB 6022	99.4	99.6	99.4	99.4	99.4	99.4	99.7	99.4	99.4		99.6	99.4	99.6	99.6	100
SLB 6237	99.3	99.8	99.8	99.8	99.8	99.8	99.7	99.8	99.8	99.6		98.9	99	99	99.3
SLB 6322	97.8	99.4	98.6	98.6	98.8	98.8	98.8	98.8	98.9	99.4	98.9		100	100	99.5
SLB 6332	98.3	99.4	98.8	98.8	98.9	98.9	98.9	98.9	98.9	99.6	99	100		100	99.6
SLB 6327	98.3	99.4	98.8	98.8	99	99	98.9	98.9	98.9	99.6	99	100	100		99.7
SLB 6014	98.6	99.6	99.1	99.1	99.3	99.3	99.5	99.3	99.3	100	99.3	99.5	99.6	99.7
Percent identity matrix based on ClustalW alignment for Fusarium fujikuroi and Fusarium proliferatum (bold font) isolates obtained from southeastern U.S. winegrapes during this study.
	NRRL 66429	SLB 6072	SLB 6109	SLB 6172	SLB 6005	SLB 6190	SLB 6174	SLB 6317	SLB 6204	SLB 6300	SLB 6278	SLB 6020	SLB 6177	NRRL 66452	NRRL 66415	NRRL 66423	NRRL 66432	NRRL 66439	NRRL 66446	SLB 6270	NRRL 66430	NRRL 66444	NRRL 66448	NRRL 66418	SLB 6257	NRRL 66437	SLB 6092	NRRL 66445	SLB 6163	SLB 6200	SLB 6140	NRRL 66426	NRRL 66427	NRRL 66421	NRRL 66447	SLB 6184	NRRL 66425	NRRL 66443	SLB 6258	NRRL 66450	NRRL 66453	SLB 6064	SLB 6239	SLB 6240	NRRL 66441	SLB 6196	NRRL 66431	NRRL 66428	NRRL 66438
NRRL 66429		100	100	99.8	99.6	100	100	99.8	99.8	99.6	99.5	100	100	100	99.8	99.8	100	99.8	99.8	99.8	99.8	99.8	99.8	99.6	100	99.8	99.8	99.5	99.5	99.8	99.8	99.8	99.8	99.6	99.8	99.5	99.2	99.6	99.6	99.6	99.6	99.6	99.6	100	100	99.6	99.8	99.8	99.3
SLB 6072	100		100	99.8	99.6	100	100	99.8	99.8	99.6	99.5	100	100	100	99.8	99.8	100	99.8	99.8	99.8	99.8	99.8	99.8	99.7	100	99.8	99.8	99.5	99.5	99.8	99.8	99.8	99.8	99.7	99.8	99.5	99.2	99.7	99.7	99.7	99.7	99.7	99.6	100	100	99.6	99.8	99.8	99.3
SLB 6109	100	100		99.8	99.7	100	100	99.8	99.8	99.6	99.5	100	100	100	99.8	99.8	100	99.8	99.8	99.8	99.8	99.8	99.8	99.6	100	99.8	99.8	99.4	99.5	99.8	99.8	99.8	99.8	99.6	99.8	99.4	99.2	99.6	99.6	99.6	99.6	99.6	99.6	100	100	99.6	99.8	99.8	99.3
SLB 6172	99.8	99.8	99.8		99.8	99.8	99.8	100	100	99.4	99.2	99.8	99.8	99.8	100	100	99.8	100	100	100	100	100	100	99.8	99.8	99.6	99.6	99.3	99.3	99.6	99.6	99.6	99.6	99.5	99.6	99.3	99	99.5	99.5	99.5	99.5	99.5	99.4	99.8	99.8	99.4	99.6	100	99.1
SLB 6005	99.6	99.6	99.7	99.8		99.7	99.6	99.8	99.8	99.3	99	99.7	99.6	99.6	99.8	99.8	99.6	99.8	99.8	99.8	99.8	99.8	99.8	100	99.6	99.5	99.4	99.1	99.1	99.5	99.5	99.5	99.5	99.3	99.5	99.1	98.8	99.3	99.3	99.3	99.3	99.3	99.2	99.6	99.5	99.2	99.4	99.8	98.9
SLB 6190	100	100	100	99.8	99.7		100	99.8	99.8	99.6	99.5	100	100	100	99.8	99.8	100	99.8	99.8	99.8	99.8	99.8	99.8	99.6	100	99.8	99.8	99.5	99.5	99.8	99.8	99.8	99.8	99.6	99.8	99.5	99.2	99.6	99.6	99.6	99.6	99.6	99.6	100	100	99.6	99.8	99.8	99.3
SLB 6174	100	100	100	99.8	99.6	100		99.8	99.8	99.6	99.5	100	100	100	99.8	99.8	100	99.8	99.8	99.8	99.8	99.8	99.8	99.6	100	99.8	99.8	99.4	99.5	99.8	99.8	99.8	99.8	99.6	99.8	99.5	99.2	99.6	99.6	99.6	99.6	99.6	99.6	100	100	99.6	99.8	99.8	99.3
SLB 6317	99.8	99.8	99.8	100	99.8	99.8	99.8		100	99.4	99.2	99.8	99.8	99.8	100	100	99.8	100	100	100	100	100	100	99.8	99.8	99.6	99.6	99.3	99.3	99.6	99.6	99.6	99.6	99.5	99.6	99.3	99	99.5	99.5	99.5	99.5	99.5	99.4	99.8	99.8	99.4	99.6	100	99.1
SLB 6204	99.8	99.8	99.8	100	99.8	99.8	99.8	100		99.4	99.2	99.8	99.8	99.8	100	100	99.8	100	100	100	100	100	100	99.8	99.8	99.7	99.6	99.3	99.3	99.7	99.7	99.7	99.7	99.5	99.7	99.3	99.1	99.5	99.5	99.5	99.5	99.5	99.5	99.8	99.8	99.4	99.6	100	99.1
SLB 6300	99.6	99.6	99.6	99.4	99.3	99.6	99.6	99.4	99.4		100	99.6	99.6	99.6	99.4	99.4	99.6	99.4	99.4	99.4	99.4	99.4	99.4	99.3	99.6	99.4	99.4	99.1	99.1	99.4	99.4	99.4	99.4	99.3	99.4	99.1	98.8	100	100	100	100	100	100	99.6	99.5	99.2	99.4	99.4	98.9
SLB 6278	99.5	99.5	99.5	99.2	99	99.5	99.5	99.2	99.2	100		99.5	99.5	99.5	99.2	99.2	99.5	99.2	99.2	99.2	99.2	99.2	99.2	99	99.5	99.2	99.2	99	99	99.2	99.2	99.2	99.2	99.2	99.2	99.2	98.3	100	100	100	100	100	100	99.5	99.5	99	99.2	99.2	99.2
SLB 6020	100	100	100	99.8	99.7	100	100	99.8	99.8	99.6	99.5		100	100	99.8	99.8	100	99.8	99.8	99.8	99.8	99.8	99.8	99.7	100	99.8	99.8	99.5	99.5	99.8	99.8	99.8	99.8	99.7	99.8	99.5	99.2	99.7	99.7	99.7	99.7	99.7	99.7	100	100	99.6	99.8	99.8	99.3
SLB 6177	100	100	100	99.8	99.6	100	100	99.8	99.8	99.6	99.5	100		100	99.8	99.8	100	99.8	99.8	99.8	99.8	99.8	99.8	99.7	100	99.8	99.8	99.5	99.5	99.8	99.8	99.8	99.8	99.7	99.8	99.5	99.2	99.7	99.7	99.7	99.7	99.7	99.6	100	100	99.6	99.8	99.8	99.3
NRRL 66452	100	100	100	99.8	99.6	100	100	99.8	99.8	99.6	99.5	100	100		99.8	99.8	100	99.8	99.8	99.8	99.8	99.8	99.8	99.7	100	99.8	99.8	99.5	99.5	99.8	99.8	99.8	99.8	99.7	99.8	99.5	99.2	99.7	99.7	99.7	99.7	99.7	99.6	100	100	99.6	99.8	99.8	99.3
NRRL 66415	99.8	99.8	99.8	100	99.8	99.8	99.8	100	100	99.4	99.2	99.8	99.8	99.8		100	99.8	100	100	100	100	100	100	99.8	99.8	99.6	99.6	99.3	99.3	99.6	99.6	99.6	99.6	99.5	99.6	99.3	99	99.5	99.5	99.5	99.5	99.5	99.4	99.8	99.8	99.4	99.6	100	99.1
NRRL 66423	99.8	99.8	99.8	100	99.8	99.8	99.8	100	100	99.4	99.2	99.8	99.8	99.8	100		99.8	100	100	100	100	100	100	99.8	99.8	99.6	99.6	99.3	99.3	99.6	99.6	99.6	99.6	99.5	99.6	99.3	99	99.5	99.5	99.5	99.5	99.5	99.4	99.8	99.8	99.4	99.6	100	99.1
NRRL 66432	100	100	100	99.8	99.6	100	100	99.8	99.8	99.6	99.5	100	100	100	99.8	99.8		99.8	99.8	99.8	99.8	99.8	99.8	99.7	100	99.8	99.8	99.5	99.5	99.8	99.8	99.8	99.8	99.7	99.8	99.5	99.2	99.7	99.7	99.7	99.7	99.7	99.6	100	100	99.6	99.8	99.8	99.3
NRRL 66439	99.8	99.8	99.8	100	99.8	99.8	99.8	100	100	99.4	99.2	99.8	99.8	99.8	100	100	99.8		100	100	100	100	100	99.8	99.8	99.7	99.6	99.3	99.3	99.7	99.7	99.7	99.7	99.5	99.7	99.3	99.1	99.5	99.5	99.5	99.5	99.5	99.5	99.8	99.8	99.5	99.6	100	99.1
NRRL 66446	99.8	99.8	99.8	100	99.8	99.8	99.8	100	100	99.4	99.2	99.8	99.8	99.8	100	100	99.8	100		100	100	100	100	99.8	99.8	99.7	99.6	99.3	99.3	99.7	99.7	99.7	99.7	99.5	99.7	99.3	99	99.5	99.5	99.5	99.5	99.5	99.4	99.8	99.8	99.4	99.6	100	99.1
SLB 6270	99.8	99.8	99.8	100	99.8	99.8	99.8	100	100	99.4	99.2	99.8	99.8	99.8	100	100	99.8	100	100		100	100	100	99.8	99.8	99.7	99.6	99.3	99.3	99.7	99.7	99.7	99.7	99.5	99.7	99.3	99.1	99.5	99.5	99.5	99.5	99.5	99.5	99.8	99.8	99.5	99.6	100	99.1
NRRL 66430	99.8	99.8	99.8	100	99.8	99.8	99.8	100	100	99.4	99.2	99.8	99.8	99.8	100	100	99.8	100	100	100		100	100	99.8	99.8	99.7	99.6	99.3	99.3	99.7	99.7	99.7	99.7	99.5	99.7	99.3	99.1	99.5	99.5	99.5	99.5	99.5	99.5	99.8	99.8	99.5	99.6	100	99.1
NRRL 66444	99.8	99.8	99.8	100	99.8	99.8	99.8	100	100	99.4	99.2	99.8	99.8	99.8	100	100	99.8	100	100	100	100		100	99.8	99.8	99.7	99.6	99.3	99.3	99.7	99.7	99.7	99.7	99.5	99.7	99.3	99.1	99.5	99.5	99.5	99.5	99.5	99.5	99.8	99.8	99.5	99.6	100	99.1
NRRL 66448	99.8	99.8	99.8	100	99.8	99.8	99.8	100	100	99.4	99.2	99.8	99.8	99.8	100	100	99.8	100	100	100	100	100		99.8	99.8	99.7	99.6	99.3	99.3	99.7	99.7	99.7	99.7	99.5	99.7	99.3	99.1	99.5	99.5	99.5	99.5	99.5	99.5	99.8	99.8	99.5	99.6	100	99.1
NRRL 66418	99.6	99.7	99.6	99.8	100	99.6	99.6	99.8	99.8	99.3	99	99.7	99.7	99.7	99.8	99.8	99.7	99.8	99.8	99.8	99.8	99.8	99.8		99.7	99.5	99.4	99.1	99.1	99.5	99.5	99.5	99.5	99.3	99.5	99.1	98.9	99.3	99.3	99.3	99.3	99.3	99.3	99.6	99.5	99.3	99.5	99.8	99
SLB 6257	100	100	100	99.8	99.6	100	100	99.8	99.8	99.6	99.5	100	100	100	99.8	99.8	100	99.8	99.8	99.8	99.8	99.8	99.8	99.7		99.8	99.8	99.5	99.5	99.8	99.8	99.8	99.8	99.7	99.8	99.5	99.2	99.7	99.7	99.7	99.7	99.7	99.6	100	100	99.6	99.8	99.8	99.3
NRRL 66437	99.8	99.8	99.8	99.6	99.5	99.8	99.8	99.6	99.7	99.4	99.2	99.8	99.8	99.8	99.6	99.6	99.8	99.7	99.7	99.7	99.7	99.7	99.7	99.5	99.8		100	99.7	99.7	100	100	100	100	99.8	100	99.7	99.2	99.5	99.5	99.5	99.5	99.5	99.4	99.8	99.8	99.4	100	99.6	99.5
SLB 6092	99.8	99.8	99.8	99.6	99.4	99.8	99.8	99.6	99.6	99.4	99.2	99.8	99.8	99.8	99.6	99.6	99.8	99.6	99.6	99.6	99.6	99.6	99.6	99.4	99.8	100		99.6	99.6	100	100	100	100	99.8	100	99.6	99.1	99.4	99.4	99.4	99.4	99.4	99.4	99.8	99.8	99.4	100	99.6	100
NRRL 66445	99.5	99.5	99.4	99.3	99.1	99.5	99.4	99.3	99.3	99.1	99	99.5	99.5	99.5	99.3	99.3	99.5	99.3	99.3	99.3	99.3	99.3	99.3	99.1	99.5	99.7	99.6		100	99.7	99.7	99.7	99.7	99.5	99.7	99.3	98.9	99.1	99.1	99.1	99.1	99.1	99.1	99.5	99.5	99.1	99.6	99.3	99.1
SLB 6163	99.5	99.5	99.5	99.3	99.1	99.5	99.5	99.3	99.3	99.1	99	99.5	99.5	99.5	99.3	99.3	99.5	99.3	99.3	99.3	99.3	99.3	99.3	99.1	99.5	99.7	99.6	100		99.7	99.7	99.7	99.7	99.5	99.7	99.3	98.9	99.1	99.2	99.1	99.1	99.2	99.1	99.5	99.5	99.1	99.6	99.3	99.1
SLB 6200	99.8	99.8	99.8	99.6	99.5	99.8	99.8	99.6	99.7	99.4	99.2	99.8	99.8	99.8	99.6	99.6	99.8	99.7	99.7	99.7	99.7	99.7	99.7	99.5	99.8	100	100	99.7	99.7		100	100	100	99.8	100	99.7	99.2	99.5	99.5	99.5	99.5	99.5	99.5	99.8	99.8	99.5	100	99.6	99.5
SLB 6140	99.8	99.8	99.8	99.6	99.5	99.8	99.8	99.6	99.7	99.4	99.2	99.8	99.8	99.8	99.6	99.6	99.8	99.7	99.7	99.7	99.7	99.7	99.7	99.5	99.8	100	100	99.7	99.7	100		100	100	99.8	100	99.7	99.2	99.5	99.5	99.5	99.5	99.5	99.5	99.8	99.8	99.5	100	99.6	99.5
NRRL 66426	99.8	99.8	99.8	99.6	99.5	99.8	99.8	99.6	99.7	99.4	99.2	99.8	99.8	99.8	99.6	99.6	99.8	99.7	99.7	99.7	99.7	99.7	99.7	99.5	99.8	100	100	99.7	99.7	100	100		100	99.8	100	99.7	99.2	99.5	99.5	99.5	99.5	99.5	99.5	99.8	99.8	99.5	100	99.6	99.5
NRRL 66427	99.8	99.8	99.8	99.6	99.5	99.8	99.8	99.6	99.7	99.4	99.2	99.8	99.8	99.8	99.6	99.6	99.8	99.7	99.7	99.7	99.7	99.7	99.7	99.5	99.8	100	100	99.7	99.7	100	100	100		99.8	100	99.7	99.2	99.5	99.5	99.5	99.5	99.5	99.5	99.8	99.8	99.5	100	99.6	99.5
NRRL 66421	99.6	99.7	99.6	99.5	99.3	99.6	99.6	99.5	99.5	99.3	99.2	99.7	99.7	99.7	99.5	99.5	99.7	99.5	99.5	99.5	99.5	99.5	99.5	99.3	99.7	99.8	99.8	99.5	99.5	99.8	99.8	99.8	99.8		99.8	99.5	99.1	99.3	99.3	99.3	99.3	99.3	99.3	99.6	99.8	99.3	99.8	99.5	99.3
NRRL 66447	99.8	99.8	99.8	99.6	99.5	99.8	99.8	99.6	99.7	99.4	99.2	99.8	99.8	99.8	99.6	99.6	99.8	99.7	99.7	99.7	99.7	99.7	99.7	99.5	99.8	100	100	99.7	99.7	100	100	100	100	99.8		99.7	99.2	99.5	99.5	99.5	99.5	99.5	99.5	99.8	99.8	99.5	100	99.6	99.5
SLB 6184	99.5	99.5	99.4	99.3	99.1	99.5	99.5	99.3	99.3	99.1	99.2	99.5	99.5	99.5	99.3	99.3	99.5	99.3	99.3	99.3	99.3	99.3	99.3	99.1	99.5	99.7	99.6	99.3	99.3	99.7	99.7	99.7	99.7	99.5	99.7		98.9	99.1	99.2	99.1	99.1	99.2	99.1	99.5	99.8	99.1	99.6	99.3	99.1
NRRL 66425	99.2	99.2	99.2	99	98.8	99.2	99.2	99	99.1	98.8	98.3	99.2	99.2	99.2	99	99	99.2	99.1	99	99.1	99.1	99.1	99.1	98.9	99.2	99.2	99.1	98.9	98.9	99.2	99.2	99.2	99.2	99.1	99.2	98.9		98.9	98.9	98.9	98.9	98.9	98.8	99.2	99	98.8	99.2	99	98.7
NRRL 66443	99.6	99.7	99.6	99.5	99.3	99.6	99.6	99.5	99.5	100	100	99.7	99.7	99.7	99.5	99.5	99.7	99.5	99.5	99.5	99.5	99.5	99.5	99.3	99.7	99.5	99.4	99.1	99.1	99.5	99.5	99.5	99.5	99.3	99.5	99.1	98.9		100	100	100	100	100	99.6	99.5	99.3	99.5	99.5	99
SLB 6258	99.6	99.7	99.6	99.5	99.3	99.6	99.6	99.5	99.5	100	100	99.7	99.7	99.7	99.5	99.5	99.7	99.5	99.5	99.5	99.5	99.5	99.5	99.3	99.7	99.5	99.4	99.1	99.2	99.5	99.5	99.5	99.5	99.3	99.5	99.2	98.9	100		100	100	100	100	99.6	99.5	99.3	99.5	99.5	99
NRRL 66450	99.6	99.7	99.6	99.5	99.3	99.6	99.6	99.5	99.5	100	100	99.7	99.7	99.7	99.5	99.5	99.7	99.5	99.5	99.5	99.5	99.5	99.5	99.3	99.7	99.5	99.4	99.1	99.1	99.5	99.5	99.5	99.5	99.3	99.5	99.1	98.9	100	100		100	100	100	99.6	99.5	99.3	99.5	99.5	99
NRRL 66453	99.6	99.7	99.6	99.5	99.3	99.6	99.6	99.5	99.5	100	100	99.7	99.7	99.7	99.5	99.5	99.7	99.5	99.5	99.5	99.5	99.5	99.5	99.3	99.7	99.5	99.4	99.1	99.1	99.5	99.5	99.5	99.5	99.3	99.5	99.1	98.9	100	100	100		100	100	99.6	99.5	99.3	99.5	99.5	99
SLB 6064	99.6	99.7	99.6	99.5	99.3	99.6	99.6	99.5	99.5	100	100	99.7	99.7	99.7	99.5	99.5	99.7	99.5	99.5	99.5	99.5	99.5	99.5	99.3	99.7	99.5	99.4	99.1	99.2	99.5	99.5	99.5	99.5	99.3	99.5	99.2	98.9	100	100	100	100		100	99.6	99.5	99.3	99.5	99.5	99
SLB 6239	99.6	99.6	99.6	99.4	99.2	99.6	99.6	99.4	99.5	100	100	99.7	99.6	99.6	99.4	99.4	99.6	99.5	99.4	99.5	99.5	99.5	99.5	99.3	99.6	99.4	99.4	99.1	99.1	99.5	99.5	99.5	99.5	99.3	99.5	99.1	98.8	100	100	100	100	100		99.6	99.5	99.3	99.5	99.5	99.3
SLB 6240	100	100	100	99.8	99.6	100	100	99.8	99.8	99.6	99.5	100	100	100	99.8	99.8	100	99.8	99.8	99.8	99.8	99.8	99.8	99.6	100	99.8	99.8	99.5	99.5	99.8	99.8	99.8	99.8	99.6	99.8	99.5	99.2	99.6	99.6	99.6	99.6	99.6	99.6		100	99.6	99.8	99.8	99.8
NRRL 66441	100	100	100	99.8	99.5	100	100	99.8	99.8	99.5	99.5	100	100	100	99.8	99.8	100	99.8	99.8	99.8	99.8	99.8	99.8	99.5	100	99.8	99.8	99.5	99.5	99.8	99.8	99.8	99.8	99.8	99.8	99.8	99	99.5	99.5	99.5	99.5	99.5	99.5	100		99.5	99.8	99.8	99.8
SLB 6196	99.6	99.6	99.6	99.4	99.2	99.6	99.6	99.4	99.4	99.2	99	99.6	99.6	99.6	99.4	99.4	99.6	99.5	99.4	99.5	99.5	99.5	99.5	99.3	99.6	99.4	99.4	99.1	99.1	99.5	99.5	99.5	99.5	99.3	99.5	99.1	98.8	99.3	99.3	99.3	99.3	99.3	99.3	99.6	99.5		99.5	99.5	99.5
NRRL 66431	99.8	99.8	99.8	99.6	99.4	99.8	99.8	99.6	99.6	99.4	99.2	99.8	99.8	99.8	99.6	99.6	99.8	99.6	99.6	99.6	99.6	99.6	99.6	99.5	99.8	100	100	99.6	99.6	100	100	100	100	99.8	100	99.6	99.2	99.5	99.5	99.5	99.5	99.5	99.5	99.8	99.8	99.5		99.6	99.9
NRRL 66428	99.8	99.8	99.8	100	99.8	99.8	99.8	100	100	99.4	99.2	99.8	99.8	99.8	100	100	99.8	100	100	100	100	100	100	99.8	99.8	99.6	99.6	99.3	99.3	99.6	99.6	99.6	99.6	99.5	99.6	99.3	99	99.5	99.5	99.5	99.5	99.5	99.5	99.8	99.8	99.5	99.6		99.6
NRRL 66438	99.3	99.3	99.3	99.1	98.9	99.3	99.3	99.1	99.1	98.9	99.2	99.3	99.3	99.3	99.1	99.1	99.3	99.1	99.1	99.1	99.1	99.1	99.1	99	99.3	99.5	100	99.1	99.1	99.5	99.5	99.5	99.5	99.3	99.5	99.1	98.7	99	99	99	99	99	99.3	99.8	99.8	99.5	99.9	99.6
SLB 6284	99.2	99.2	99.2	99	98.8	99.2	99.2	99	99	99.6	99.5	99.2	99.2	99.2	99	99	99.2	99	99	99	99	99	99	98.9	99.2	99	99	98.7	98.7	99	99	99	99	98.9	99	98.7	98.4	99.6	99.6	99.6	99.6	99.6	99.6	99.2	99.1	98.9	99	99	99
SLB 6099	96	96.1	96.5	96.5	96.7	96.3	96.3	96.4	96.5	96.4	96.7	96.4	96.1	96	96.2	96.2	96	96.2	96.2	96.2	96.2	96.2	96.2	96.4	96.1	95.8	96	95.5	95.6	95.8	95.9	95.8	95.8	95.7	95.8	95.5	95.4	96.2	96.2	96.2	96.2	96.2	96.6	96.3	96.3	95.9	96.2	96.6	95.5
SLB 6115	96.2	96.2	96.5	96.6	96.8	96.5	96.3	96.5	96.6	96.4	96.7	96.5	96.2	96.2	96.4	96.4	96.2	96.4	96.4	96.4	96.4	96.4	96.4	96.5	96.2	96	96.2	95.6	95.7	96	96	96	96	95.8	96	95.7	95.5	96.4	96.4	96.4	96.4	96.4	96.7	96.5	96.5	96.1	96.3	96.7	95.6
SLB 6046	96.3	96.3	96.3	96.5	96.7	96.3	96.3	96.5	96.5	96.5	96.7	96.3	96.3	96.3	96.5	96.5	96.3	96.5	96.5	96.5	96.5	96.5	96.5	96.7	96.3	96.1	96.2	95.7	95.7	96.1	96.1	96.1	96.1	95.9	96.1	95.7	95.6	96.5	96.5	96.5	96.5	96.5	96.7	96.5	96.5	96.1	96.3	96.7	95.7
SLB 6038	96.7	96.7	96.7	96.9	97	96.7	96.7	96.9	96.9	96.9	97.1	96.7	96.7	96.7	96.9	96.9	96.7	96.9	96.9	96.9	96.9	96.9	96.9	97	96.7	96.7	96.7	96.3	96.3	96.7	96.7	96.7	96.7	96.5	96.7	96.3	96.7	96.9	96.9	96.9	96.9	96.9	97	96.8	96.9	96.4	96.8	97	96.3
SLB 6052	96	95.8	96.2	95.9	96.1	95.7	96.2	95.9	95.9	96.3	96.7	95.8	95.8	95.8	95.9	95.9	95.8	95.9	95.9	95.9	95.9	95.9	95.9	96.1	95.8	95.6	96	95.2	95.2	95.6	95.6	95.6	95.6	95.4	95.6	95.2	95.1	95.9	95.9	95.9	95.9	95.9	96.3	96	95.9	95.7	95.9	96.3	95.2
SLB 6022	96.9	96.9	96.9	97	97.2	96.9	96.9	97	97	97	97.2	96.9	96.9	96.9	97	97	96.9	97	97	97	97	97	97	97.2	96.9	96.7	96.8	96.3	96.3	96.7	96.7	96.7	96.7	96.5	96.7	96.3	96.2	97	97	97	97	97	97.3	97	97	96.6	96.9	97.3	96.3
NRRL 66451	96.4	96.4	96.5	96.6	96.8	96.4	96.5	96.6	96.6	96.5	96.5	96.4	96.4	96.4	96.6	96.6	96.4	96.6	96.6	96.6	96.6	96.6	96.6	96.8	96.4	96.2	96.2	95.9	95.9	96.2	96.2	96.2	96.2	96	96.2	95.9	95.9	96.4	96.4	96.4	96.4	96.4	96.6	96.5	96.3	96.1	96.4	96.8	95.9
SLB 6014	96.6	96.3	96.7	96.4	96.6	96.3	96.7	96.4	96.5	96.7	96.7	96.3	96.3	96.3	96.5	96.5	96.3	96.5	96.5	96.5	96.5	96.5	96.5	96.7	96.3	96.2	96.4	95.8	95.8	96.2	96.2	96.2	96.2	96	96.2	95.8	95.7	96.3	96.3	96.3	96.3	96.3	96.5	96.5	96.3	96.1	96.3	96.7	95.8
NRRL 66416	96.6	96.4	96.7	96.4	96.6	96.3	96.7	96.4	96.5	96.7	96.7	96.4	96.4	96.4	96.5	96.5	96.4	96.5	96.5	96.5	96.5	96.5	96.5	96.7	96.4	96.2	96.4	95.9	95.9	96.2	96.2	96.2	96.2	96	96.2	95.9	95.8	96.4	96.4	96.4	96.4	96.4	96.5	96.5	96.3	96.1	96.4	96.7	95.9
NRRL 66417	96.4	96.2	96.5	96.3	96.4	96.1	96.5	96.3	96.4	96.5	96.5	96.3	96.3	96.2	96.3	96.3	96.3	96.4	96.4	96.4	96.4	96.4	96.4	96.6	96.3	96	96.2	95.8	95.8	96.1	96.1	96.1	96.1	95.9	96.1	95.8	95.7	96.3	96.3	96.3	96.3	96.3	96.4	96.4	96.2	96	96.3	96.6	95.8
NRRL 66420	95.9	95.5	96	95.7	95.9	95.5	96	95.7	95.7	96.2	96.5	95.6	95.6	95.5	95.8	95.6	95.6	95.7	95.7	95.7	95.7	95.7	95.7	95.9	95.6	95.4	95.8	95.1	95.1	95.4	95.4	95.4	95.4	95.2	95.4	95.1	95	95.8	95.8	95.8	95.8	95.8	96.1	95.8	95.7	95.5	95.7	96.1	95.1
NRRL 66442	96	95.7	96.2	95.9	96.1	95.7	96.2	95.9	95.9	96.3	96.7	95.8	95.8	95.7	96	95.8	95.8	95.9	95.9	95.9	95.9	95.9	95.9	96.1	95.8	95.5	96	95.2	95.2	95.6	95.6	95.6	95.6	95.4	95.6	95.2	95.2	95.9	95.9	95.9	95.9	95.9	96.3	96	95.9	95.7	95.9	96.2	95.2
SLB 6028	96	95.7	96.2	95.9	96.1	95.7	96.2	95.9	95.9	96.4	96.7	95.7	95.7	95.7	96	95.8	95.7	95.9	95.9	95.9	95.9	95.9	95.9	96.1	95.7	95.5	96	95.2	95.2	95.6	95.6	95.6	95.6	95.4	95.6	95.2	95.1	95.9	95.9	95.9	95.9	95.9	96.2	96	95.9	95.6	95.9	96.2	95.2
SLB 6061	96	95.7	96.1	95.9	96	95.7	96.1	95.9	95.8	96.3	96.7	95.7	95.7	95.7	95.9	95.8	95.7	95.8	95.8	95.8	95.8	95.8	95.8	96	95.7	95.5	96	95.1	95.1	95.5	95.5	95.5	95.5	95.3	95.5	95.1	95	95.8	95.8	95.8	95.8	95.8	96.2	95.9	95.8	95.6	95.8	96.2	95.1
SLB 6009	96.2	96.2	96.2	96.5	96.8	96.2	96.2	96.5	96.5	96.5	96.5	96.2	96.2	96.2	96.5	96.5	96.2	96.5	96.5	96.5	96.5	96.5	96.5	96.8	96.2	96	96	95.7	95.7	96	96	96	96	96	96	96	95.3	96.5	96.5	96.5	96.5	96.5	96.5	96.2	96.2	95.7	96	96.5	96
NRRL 66422	96	95.7	96.2	95.9	96.1	95.7	96.2	95.9	95.9	96.3	96.7	95.8	95.8	95.7	96	95.8	95.8	95.9	95.9	95.9	95.9	95.9	95.9	96.1	95.8	95.5	96	95.2	95.2	95.6	95.6	95.6	95.6	95.4	95.6	95.2	95.2	95.9	95.9	95.9	95.9	95.9	96.3	96	95.9	95.7	95.9	96.2	95.2
NRRL 66424	96	95.7	96.2	95.9	96.1	95.7	96.2	95.9	95.9	96.3	96.7	95.8	95.8	95.7	96	95.8	95.8	95.9	95.9	95.9	95.9	95.9	95.9	96.1	95.8	95.5	96	95.2	95.2	95.6	95.6	95.6	95.6	95.4	95.6	95.2	95.2	95.9	95.9	95.9	95.9	95.9	96.3	96	95.9	95.7	95.9	96.2	95.2
SLB 6237	96	95.7	96.2	95.9	96.1	95.7	96.2	95.9	95.9	96.4	96.7	96	95.8	95.7	96	95.8	95.8	95.9	95.9	96	95.9	95.9	95.9	96.1	95.9	95.5	96	95.2	95.3	95.6	95.6	95.6	95.6	95.4	95.6	95.4	95.2	95.9	96	95.9	95.9	96	96.4	96.1	95.9	95.7	95.9	96.2	95.2
NRRL 66419	96	95.7	96.2	95.9	96.1	95.7	96.2	95.9	95.9	96.3	96.2	95.8	95.8	95.7	96	95.8	95.8	95.9	95.9	95.9	95.9	95.9	95.9	96.1	95.8	95.5	95.8	95.2	95.2	95.6	95.6	95.6	95.6	95.4	95.6	95.2	95.2	95.9	95.9	95.9	95.9	95.9	96.1	95.8	95.5	95.5	95.7	96.1	95.2
SLB 6322	96.3	96	96.5	96.1	96.3	95.8	96.5	96.1	96.2	96.2	96.2	96	96	96	96.1	96.2	96	96.2	96.2	96.2	96.2	96.2	96.2	96.5	96	95.7	96	95.4	95.4	95.7	95.7	95.7	95.7	95.7	95.7	95.7	95.3	95.7	95.7	95.7	95.7	95.7	95.7	96	96	95.4	95.7	96.2	95.7
SLB 6332	96.5	96.3	96.7	96.4	96.5	96.2	96.7	96.4	96.5	96.6	96.5	96.4	96.4	96.3	96.4	96.5	96.4	96.5	96.5	96.6	96.5	96.5	96.5	96.7	96.4	96.1	96.2	95.9	95.9	96.2	96.2	96.2	96.2	96	96.2	95.9	95.9	96.4	96.4	96.4	96.4	96.4	96.4	96.4	96.2	96	96.3	96.6	95.9
SLB 6327	96.4	96.2	96.7	96.5	96.6	96.3	96.7	96.4	96.6	96.6	96.5	96.6	96.4	96.2	96.3	96.3	96.3	96.4	96.4	96.5	96.4	96.4	96.4	96.6	96.4	96	96.2	95.8	95.9	96.1	96.1	96.1	96.1	95.9	96.1	95.9	95.8	96.3	96.4	96.3	96.3	96.3	96.6	96.4	96.2	96	96.3	96.6	95.8
[truncated: 23 more columns]
